# Supplementary material
Source: MDPI journal article supplement (https://www.mdpi.com/2072-4292/9/5/463)
Supplement: s1 [file s1]

Supplementary Material

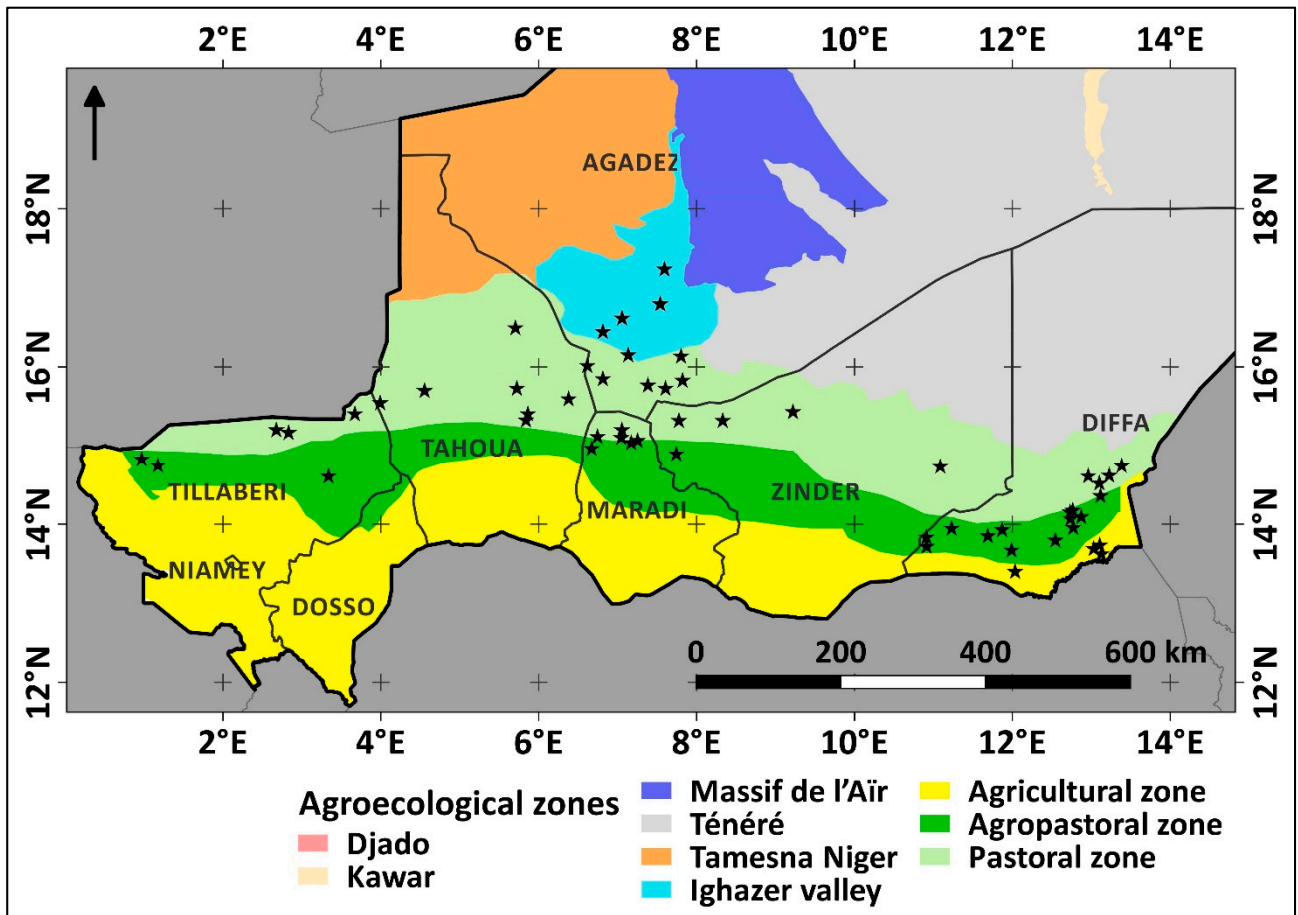

**Figure S1.** Agroecological zones of Niger (shape file provided by the Ministry of Livestock in Niger). Sample sites are indicated with black stars and administrative regions with dark grey lines.

**Table S1.** Model results for ISODATA clustering with fixed number of clusters. Note that not all clusters were covered by samples sites. The negative  $R^2$  in the fifth column is not a typo and indicates that the model for this calibration unit explains the data worse than a horizontal line.

| # Classes            | $R^2$ | $R^2_{cv}$ | $R^2$ range | $R^2_{cv}$ range | RMSE <sub>cv</sub> [kg ha <sup>-1</sup> ] |
|----------------------|-------|------------|-------------|------------------|-------------------------------------------|
| 5 (just 4 covered)   | 0.41  | 0.38       | 0.28 – 0.59 | 0.25 – 0.54      | 428                                       |
| 6 (just 4 covered)   | 0.43  | 0.40       | 0.26 – 0.58 | 0.22 – 0.54      | 421                                       |
| 7 (just 6 covered)   | 0.42  | 0.38       | 0.24 – 0.68 | 0.17 – 0.58      | 429                                       |
| 8 (just 6 covered)   | 0.48  | 0.44       | 0.32 – 0.60 | 0.29 – 0.55      | 408                                       |
| 9 (just 7 covered)   | 0.50  | 0.45       | 0.36 – 0.71 | 0.34 – 0.67      | 402                                       |
| 10 (just 8 covered)  | 0.50  | 0.45       | 0.36 – 0.73 | 0.30 – 0.67      | 404                                       |
| 11 (just 9 covered)  | 0.52  | 0.47       | 0.34 – 0.73 | 0.25 – 0.67      | 398                                       |
| 12 (just 10 covered) | 0.51  | 0.45       | 0.37 – 0.92 | 0.28 – 0.90      | 403                                       |
| 13 (just 11 covered) | 0.51  | 0.46       | 0.27 – 0.88 | 0.24 – 0.86      | 402                                       |
| 14 (just 11 covered) | 0.51  | 0.44       | 0.30 – 0.73 | -0.51 – 0.67     | 409                                       |
| 15 (just 10 covered) | 0.48  | 0.43       | 0.34 – 0.62 | 0.29 – 0.59      | 412                                       |

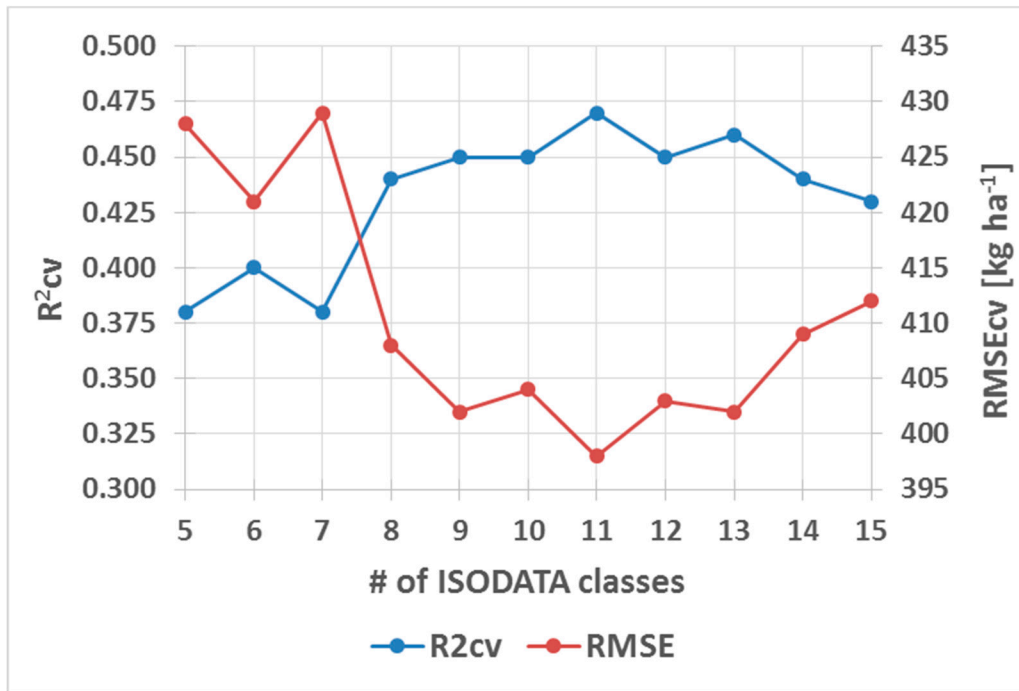

Figure S2. Performance of different ISODATA clustering-based stratifications with respect to R<sup>2</sup>cv and RMSEcv.

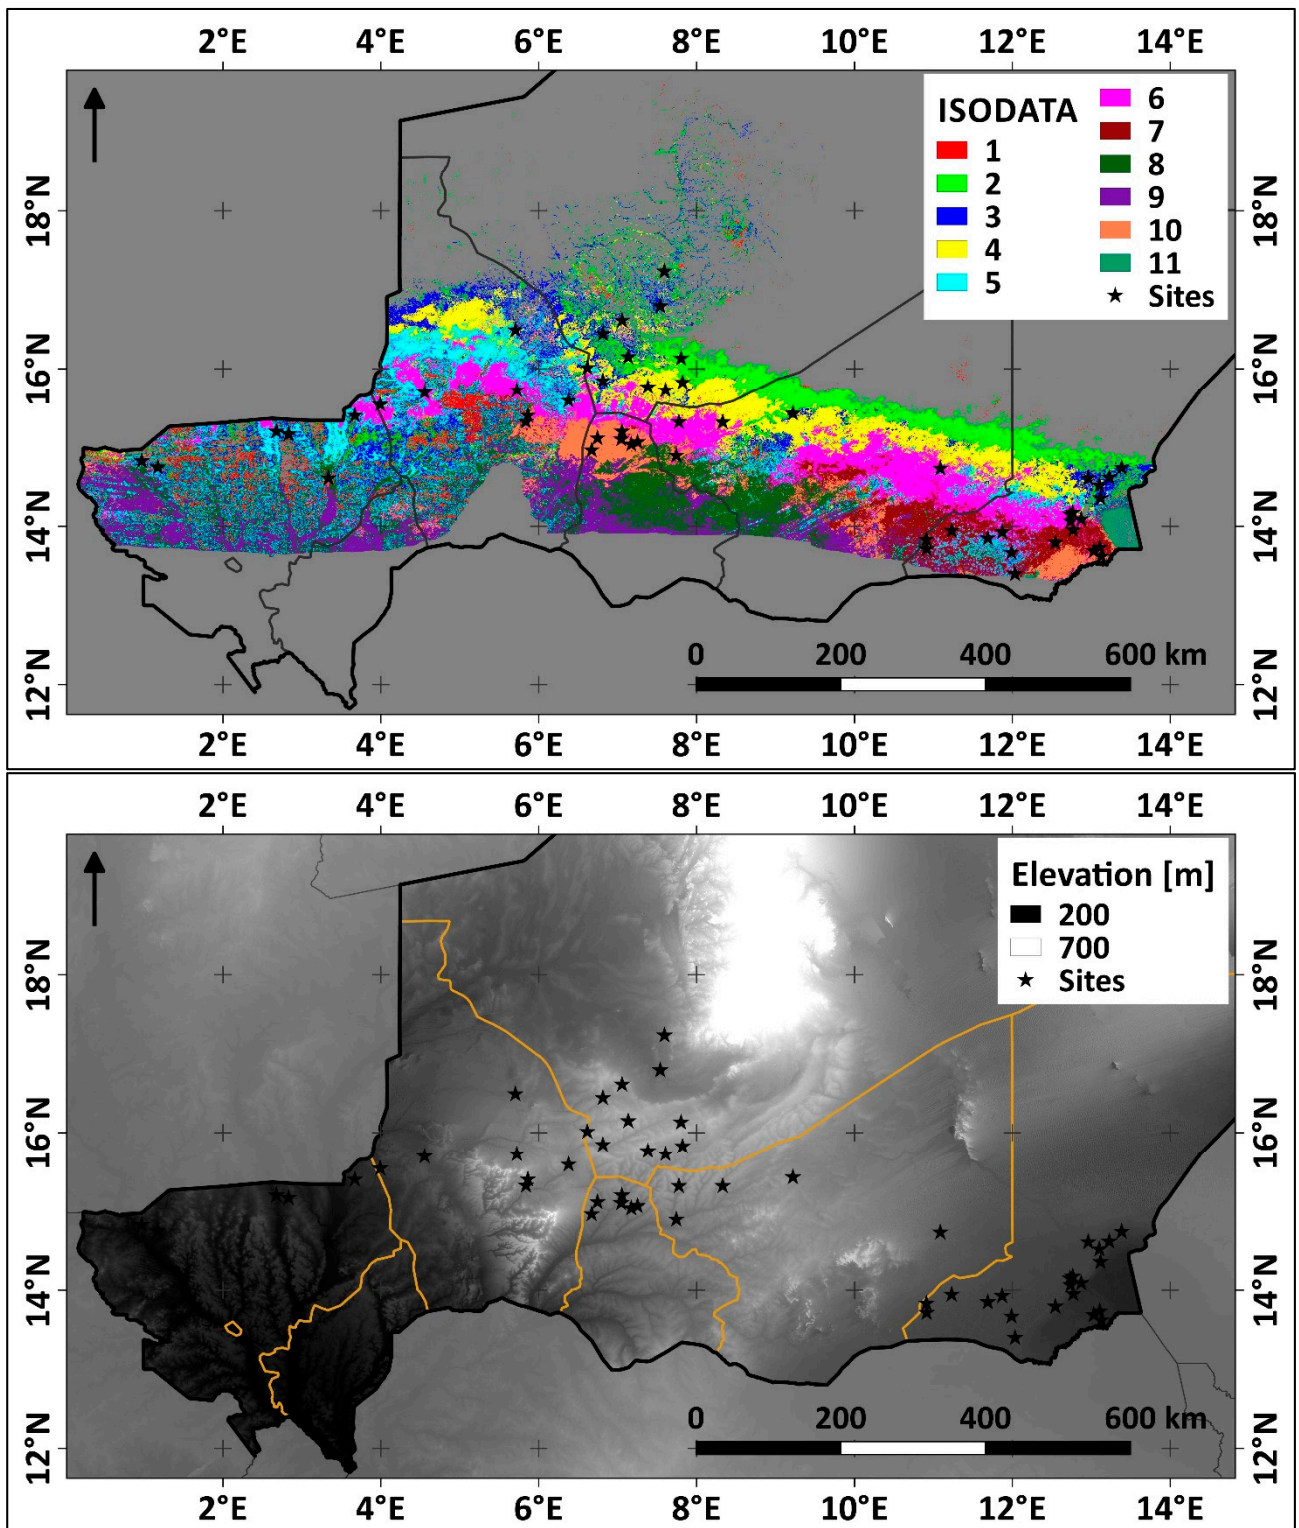

**Figure S3.** Results of the best performing ISODATA clustering (11 clusters, of which nine were represented by sample sites; top) compared with elevation (bottom) from SRTM data [44]. Sample sites are indicated with black stars and administrative regions with dark grey/orange lines.

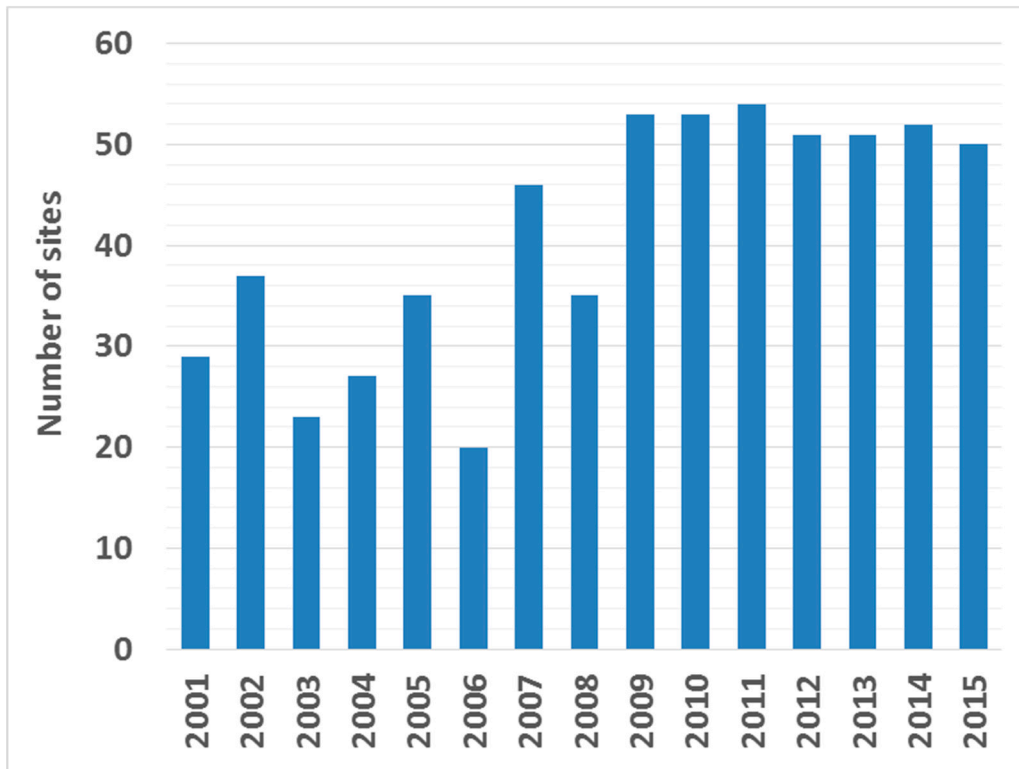

**Figure S4.** Number of available biomass measurement sites per year during the study period 2001–2015.
